# Supplementary material for: CancerGPT for few shot drug pair synergy prediction using large pretrained language models
Source: PubMed Central journal article supplement (PMC10876664; doi:10.1038/s41746-024-01024-9), 2024-02-19
Supplement: 41746_2024_1024_MOESM1_ESM.pdf [file 41746_2024_1024_MOESM1_ESM.pdf]

## Supplementary materials

### Supplementary Note 1: Prompt engineering

Prompts is one of the few variables we can control manually while using pre-trained LLMs (especially with zero-shot). We tried a variety of prompts to stimulate our models to provide the best output for both classification and to provide a reasonable explanation for the results. We share below some of the prompts tried on zero-shot GPT-3.

For classification it is important to specify the output classes that we are expecting the model to choose amongst. In its absence, the model tends to generate longer sequences by rephrasing the question before concluding with the answer that we expect.

**Prompt:** Determine the drug synergy combination for the given cancer drug combination. The first drug is *CHIR-99021*. The second drug is *SF1670*. Cell line is *AGS*. Tissue is stomach. Synergy:

**Output:** “The combination of CHIR-99021 and SF1670 has been studied ... suggests that this drug combination could be a potential therapeutic option for gastric cancer.”

On the other hand, manually specifying the class list makes the model generate the output we expect as the first word itself.

**Prompt:** Determine the drug synergy combination for the given cancer drug combination. Allowed synergies: {positive, not positive}. The first drug is CHIR-99021. The second drug is SF1670. Cell line is AGS. Tissue is stomach. Synergy:

**Output:** “Positive.”

For reasoning, correct prompts can determine the level of details we receive from the model. We show two slightly different prompts, one produces a generic answer (below), while the other is more specific to the drugs

**Prompt:** Why are drugs AZD-4877 and AZD1208 synergistic in cell line T24 for urinary\_tract cancer?

**Reasoning:** “...The combination of these two drugs has been shown to significantly reduce tumor growth and cell proliferation ... target different pathways involved in the growth and metastasis of the cancer ...”

**Prompt:** Could you explain in detail why drugs AZD-4877 and AZD1208 are synergistic in cell line T24 for urinary\_tract cancer?

**Reasoning:** “The combination of AZD-4877 and AZD1208 has been studied in T24 cells...to be synergistic in reducing bladder cancer cell growth and metastasis ... Specifically, AZD-4877 was found to inhibit the activation of proteins involved in the promotion of tumor growth.. ..AZD1208 was found to inhibit proteins associated with the inhibition of tumor growth ... effective at reducing the production of inflammatory mediators such as cytokines, which are known to contribute to tumor progression ... reduce levels of apoptosis inhibitors, which can also play a role in tumor progression”

We go over in detail and perform a fact-checking analysis of GPT-3’s response in Fact check LLM’s reasoning. Not only was it able to provide direct facts about the drugs, but also return some implied information mentioned in a related paper about a different type of cancer <sup>1, 2</sup>. However, some facts were not found out to not be true.

### Supplementary Note 2: Hyperparameter summary

| Fine-tuning   | TabTransformer | GPT2          | CancerGPT     | GPT3          |
|---------------|----------------|---------------|---------------|---------------|
| Epoch         | 1              | 4             | 4             | 4             |
| Learning Rate | 0.0001         | 5e-5          | 5e-5          | API adjusted  |
| Weight Decay  | 0.01           | 0.01          | 0.01          | API adjusted  |
| Loss Function | Cross-entropy  | Cross-entropy | Cross-entropy | Cross-entropy |
| Optimizer     | AdamW          | AdamW         | AdamW         | AdamW         |

Supplementary Table 1: Hyperparameter summary

### Supplementary Note 3: Ablation Study

|                                          | Methods                 | Number of Shots |              |              |              |              |              |              |              |
|------------------------------------------|-------------------------|-----------------|--------------|--------------|--------------|--------------|--------------|--------------|--------------|
|                                          |                         | 0               | 2            | 4            | 8            | 16           | 32           | 64           | 128          |
| Pancreas<br>( $n_0=38, n_1=1$ )          | XGBoost                 | 0.5             | -            | -            | -            | -            | -            | -            | -            |
|                                          | Collaborative Filtering | 0.763           | -            | -            | -            | -            | -            | -            | -            |
|                                          | TabTransformer          | 0.211           | -            | -            | -            | -            | -            | -            | -            |
|                                          | CancerGPT               | 0.132           | -            | -            | -            | -            | -            | -            | -            |
|                                          | GPT-2                   | 0.316           | -            | -            | -            | -            | -            | -            | -            |
|                                          | SciFive                 | 0.342           | -            | -            | -            | -            | -            | -            | -            |
|                                          | GPT-3                   | <b>0.789</b>    | -            | -            | -            | -            | -            | -            | -            |
| Liver<br>( $n_0=192, n_1=21$ )           | XGBoost                 | 0.587           | 0.587        | 0.587        | 0.587        | 0.587        | 0.587        | 0.574        | 0.574        |
|                                          | Collaborative Filtering | 0.635           | 0.705        | 0.65         | 0.564        | 0.667        | 0.538        | 0.692        | 0.75         |
|                                          | TabTransformer          | 0.76            | 0.753        | 0.76         | 0.747        | 0.837        | 0.824        | 0.76         | 0.74         |
|                                          | CancerGPT               | <b>0.853</b>    | <b>0.795</b> | <b>0.833</b> | <b>0.827</b> | <b>0.962</b> | <b>0.948</b> | <b>0.84</b>  | 0.833        |
|                                          | GPT-2                   | 0.66            | 0.468        | 0.532        | 0.442        | 0.647        | 0.75         | 0.635        | 0.59         |
|                                          | SciFive                 | 0.603           | 0.609        | 0.641        | 0.5          | 0.872        | 0.801        | 0.596        | 0.73         |
|                                          | GPT-3                   | 0.615           | 0.49         | 0.542        | 0.583        | 0.474        | 0.731        | 0.737        | <b>0.91</b>  |
| Soft Tissue<br>( $n_0=269, n_1=83$ )     | XGBoost                 | 0.491           | 0.491        | 0.491        | 0.491        | 0.454        | 0.476        | 0.542        | 0.552        |
|                                          | Collaborative Filtering | 0.582           | 0.677        | 0.589        | 0.6          | 0.672        | 0.679        | 0.66         | 0.637        |
|                                          | TabTransformer          | 0.399           | 0.299        | 0.332        | 0.459        | 0.72         | 0.79         | 0.781        | 0.756        |
|                                          | CancerGPT               | <b>0.805</b>    | <b>0.75</b>  | <b>0.803</b> | <b>0.827</b> | <b>0.817</b> | <b>0.871</b> | <b>0.899</b> | 0.9          |
|                                          | GPT-2                   | 0.398           | 0.344        | 0.465        | 0.279        | 0.459        | 0.302        | 0.394        | 0.506        |
|                                          | SciFive                 | 0.412           | 0.467        | 0.421        | 0.64         | 0.541        | 0.589        | 0.82         | <b>0.901</b> |
|                                          | GPT-3                   | 0.517           | 0.406        | 0.6          | 0.444        | 0.607        | 0.82         | 0.866        | 0.889        |
| Urinary Tract<br>( $n_0=1996, n_1=462$ ) | XGBoost                 | 0.494           | 0.494        | 0.494        | 0.494        | 0.494        | 0.526        | 0.53         | 0.544        |
|                                          | Collaborative Filtering | 0.612           | <b>0.628</b> | <b>0.653</b> | 0.595        | 0.609        | 0.597        | 0.62         | 0.629        |
|                                          | TabTransformer          | 0.493           | 0.483        | 0.482        | 0.499        | 0.48         | 0.498        | 0.501        | 0.492        |
|                                          | CancerGPT               | 0.611           | <b>0.595</b> | <b>0.604</b> | <b>0.605</b> | <b>0.625</b> | <b>0.624</b> | <b>0.63</b>  | <b>0.653</b> |
|                                          | GPT-2                   | 0.477           | 0.378        | 0.475        | 0.421        | 0.474        | 0.453        | 0.482        | 0.47         |
|                                          | SciFive                 | 0.612           | 0.532        | 0.55         | 0.562        | 0.486        | 0.477        | 0.551        | 0.528        |
|                                          | GPT-3                   | <b>0.645</b>    | 0.57         | 0.556        | 0.496        | 0.508        | 0.516        | 0.531        | 0.572        |
| Endometrium<br>( $n_0=36, n_1=32$ )      | XGBoost                 | 0.5             | 0.5          | 0.5          | 0.5          | 0.5          | 0.5          | -            | -            |
|                                          | Collaborative Filtering | <b>0.878</b>    | 0.694        | 0.673        | 0.755        | 0.693        | 0.796        | -            | -            |
|                                          | TabTransformer          | 0.327           | 0.571        | 0.816        | <b>0.939</b> | <b>0.939</b> | <b>0.918</b> | -            | -            |
|                                          | CancerGPT               | 0.551           | 0.571        | 0.571        | 0.571        | 0.673        | 0.714        | -            | -            |
|                                          | GPT-2                   | 0.163           | 0.816        | 0.878        | 0.653        | 0.612        | 0.776        | -            | -            |
|                                          | SciFive                 | 0.449           | 0.429        | 0.612        | 0.592        | 0.347        | 0.755        | -            | -            |
|                                          | GPT-3                   | <b>0.837</b>    | <b>1</b>     | <b>0.949</b> | 0.898        | 0.878        | 0.898        | -            | -            |
| Stomach<br>( $n_0=1081, n_1=109$ )       | XGBoost                 | 0.529           | 0.529        | 0.529        | 0.529        | 0.529        | 0.529        | 0.476        | 0.508        |
|                                          | Collaborative Filtering | 0.771           | 0.79         | 0.784        | 0.79         | 0.76         | 0.799        | 0.788        | 0.768        |
|                                          | TabTransformer          | 0.731           | <b>0.865</b> | <b>0.851</b> | 0.796        | 0.724        | 0.75         | 0.785        | 0.781        |
|                                          | CancerGPT               | <b>0.799</b>    | 0.804        | 0.816        | <b>0.822</b> | <b>0.822</b> | <b>0.821</b> | <b>0.831</b> | <b>0.796</b> |
|                                          | GPT-2                   | 0.607           | 0.579        | 0.481        | 0.579        | 0.519        | 0.543        | 0.428        | 0.424        |
|                                          | SciFive                 | 0.541           | 0.588        | 0.527        | 0.637        | 0.582        | 0.458        | 0.622        | 0.515        |
|                                          | GPT-3                   | 0.419           | 0.575        | 0.724        | 0.769        | 0.534        | 0.69         | 0.742        | 0.724        |
| Bone<br>( $n_0=3732, n_1=253$ )          | XGBoost                 | 0.499           | 0.499        | 0.499        | 0.499        | 0.499        | 0.499        | 0.499        | 0.499        |
|                                          | Collaborative Filtering | <b>0.782</b>    | <b>0.762</b> | <b>0.78</b>  | <b>0.77</b>  | <b>0.78</b>  | <b>0.752</b> | <b>0.772</b> | 0.774        |
|                                          | TabTransformer          | 0.547           | 0.587        | <b>0.69</b>  | <b>0.706</b> | <b>0.696</b> | <b>0.729</b> | <b>0.728</b> | 0.746        |
|                                          | CancerGPT               | 0.57            | <b>0.613</b> | 0.645        | 0.6          | 0.59         | 0.625        | 0.574        | 0.668        |
|                                          | GPT-2                   | 0.487           | 0.566        | 0.471        | 0.647        | 0.587        | 0.421        | 0.623        | 0.586        |
|                                          | SciFive                 | <b>0.599</b>    | 0.443        | 0.645        | 0.551        | 0.596        | 0.528        | 0.622        | 0.65         |
|                                          | GPT-3                   | 0.498           | 0.415        | 0.341        | 0.429        | 0.485        | 0.605        | 0.62         | <b>0.794</b> |

Supplementary Table 2: AUROC Full Tuning

$n_0$ =total number of non-synergistic samples (not positive),  $n_1$ =total number of synergistic samples (positive)

|               | Methods                 | Number of Shots |              |              |              |              |              |              |              |
|---------------|-------------------------|-----------------|--------------|--------------|--------------|--------------|--------------|--------------|--------------|
|               |                         | 0               | 2            | 4            | 8            | 16           | 32           | 64           | 128          |
| Pancreas      | XGBoost                 | 0.026           | -            | -            | -            | -            | -            | -            | -            |
|               | Collaborative Filtering | 0.1             | -            | -            | -            | -            | -            | -            | -            |
|               | TabTransformer          | 0.032           | -            | -            | -            | -            | -            | -            | -            |
|               | CancerGPT               | 0.032           | -            | -            | -            | -            | -            | -            | -            |
|               | GPT-2                   | 0.037           | -            | -            | -            | -            | -            | -            | -            |
|               | SciFive                 | 0.038           | -            | -            | -            | -            | -            | -            | -            |
|               | GPT-3                   | <b>0.111</b>    | -            | -            | -            | -            | -            | -            | -            |
| Liver         | XGBoost                 | 0.132           | 0.132        | 0.132        | 0.132        | 0.132        | 0.132        | 0.12         | 0.12         |
|               | Collaborative Filtering | 0.355           | <b>0.388</b> | <b>0.373</b> | 0.341        | 0.236        | 0.208        | 0.216        | 0.407        |
|               | TabTransformer          | 0.228           | <b>0.284</b> | <b>0.286</b> | <b>0.404</b> | 0.532        | 0.326        | 0.218        | 0.191        |
|               | CancerGPT               | 0.294           | 0.24         | 0.264        | 0.257        | <b>0.729</b> | <b>0.642</b> | <b>0.45</b>  | 0.446        |
|               | GPT-2                   | 0.156           | 0.102        | 0.148        | 0.101        | 0.353        | 0.417        | 0.209        | 0.178        |
|               | SciFive                 | <b>0.378</b>    | 0.168        | 0.172        | 0.112        | 0.362        | 0.439        | 0.22         | 0.382        |
|               | GPT-3                   | 0.185           | 0.086        | 0.096        | 0.125        | 0.124        | 0.314        | 0.362        | <b>0.519</b> |
| Soft Tissue   | XGBoost                 | 0.243           | 0.243        | 0.243        | 0.243        | 0.235        | 0.235        | 0.264        | 0.271        |
|               | Collaborative Filtering | 0.3             | 0.34         | 0.321        | 0.359        | 0.367        | 0.431        | 0.354        | 0.369        |
|               | TabTransformer          | 0.263           | 0.197        | 0.213        | 0.259        | 0.485        | 0.558        | 0.594        | 0.525        |
|               | CancerGPT               | <b>0.473</b>    | <b>0.398</b> | <b>0.461</b> | <b>0.519</b> | <b>0.521</b> | <b>0.682</b> | <b>0.703</b> | 0.599        |
|               | GPT-2                   | 0.261           | 0.188        | 0.296        | 0.173        | 0.221        | 0.203        | 0.267        | 0.332        |
|               | SciFive                 | 0.208           | 0.316        | 0.242        | 0.353        | 0.269        | 0.346        | 0.631        | <b>0.767</b> |
|               | GPT-3                   | 0.263           | 0.194        | 0.28         | 0.228        | 0.363        | 0.618        | 0.638        | 0.734        |
| Urinary Tract | XGBoost                 | 0.186           | 0.186        | 0.186        | 0.186        | 0.186        | 0.197        | 0.199        | 0.209        |
|               | Collaborative Filtering | 0.255           | <b>0.273</b> | 0.266        | 0.261        | 0.243        | 0.256        | 0.274        | 0.267        |
|               | TabTransformer          | 0.187           | 0.194        | 0.194        | 0.194        | 0.182        | 0.189        | 0.189        | 0.182        |
|               | CancerGPT               | 0.264           | <b>0.263</b> | <b>0.287</b> | <b>0.278</b> | <b>0.302</b> | <b>0.303</b> | <b>0.31</b>  | <b>0.324</b> |
|               | GPT-2                   | 0.172           | 0.145        | 0.17         | 0.175        | 0.176        | 0.181        | 0.172        | 0.17         |
|               | SciFive                 | 0.254           | 0.194        | 0.208        | 0.233        | 0.179        | 0.174        | 0.205        | 0.211        |
|               | GPT-3                   | <b>0.27</b>     | 0.228        | 0.222        | 0.201        | 0.206        | 0.2          | 0.24         | 0.272        |
| Endometrium   | XGBoost                 | 0.5             | 0.5          | 0.5          | 0.5          | 0.5          | 0.5          | -            | -            |
|               | Collaborative Filtering | <b>0.904</b>    | 0.794        | 0.687        | 0.755        | 0.654        | 0.862        | -            | -            |
|               | TabTransformer          | 0.459           | 0.632        | 0.86         | <b>0.948</b> | <b>0.948</b> | <b>0.933</b> | -            | -            |
|               | CancerGPT               | 0.513           | 0.583        | 0.539        | 0.536        | 0.639        | 0.525        | -            | -            |
|               | GPT-2                   | 0.379           | 0.821        | 0.86         | 0.723        | 0.779        | 0.82         | -            | -            |
|               | SciFive                 | 0.479           | 0.474        | 0.605        | 0.738        | 0.799        | 0.674        | -            | -            |
|               | GPT-3                   | <b>0.869</b>    | <b>1</b>     | <b>0.947</b> | 0.859        | 0.799        | 0.859        | -            | -            |
| Stomach       | XGBoost                 | 0.104           | 0.104        | 0.104        | 0.104        | 0.104        | 0.104        | 0.09         | 0.094        |
|               | Collaborative Filtering | 0.352           | <b>0.437</b> | <b>0.374</b> | <b>0.404</b> | 0.338        | <b>0.443</b> | <b>0.459</b> | 0.35         |
|               | TabTransformer          | 0.214           | <b>0.408</b> | <b>0.355</b> | 0.293        | 0.24         | 0.259        | 0.298        | 0.341        |
|               | CancerGPT               | <b>0.352</b>    | 0.331        | 0.342        | <b>0.335</b> | <b>0.41</b>  | <b>0.43</b>  | <b>0.419</b> | <b>0.389</b> |
|               | GPT-2                   | 0.123           | 0.115        | 0.143        | 0.111        | 0.098        | 0.108        | 0.08         | 0.083        |
|               | SciFive                 | 0.104           | 0.134        | 0.107        | 0.216        | 0.145        | 0.084        | 0.152        | 0.129        |
|               | GPT-3                   | 0.078           | 0.106        | 0.17         | 0.37         | 0.1          | 0.19         | 0.219        | 0.181        |
| Bone          | XGBoost                 | 0.064           | 0.064        | 0.064        | 0.064        | 0.064        | 0.064        | 0.064        | 0.064        |
|               | Collaborative Filtering | <b>0.174</b>    | <b>0.147</b> | <b>0.176</b> | <b>0.163</b> | <b>0.172</b> | 0.164        | <b>0.186</b> | 0.165        |
|               | TabTransformer          | 0.09            | <b>0.11</b>  | <b>0.139</b> | <b>0.152</b> | <b>0.142</b> | <b>0.166</b> | <b>0.158</b> | 0.176        |
|               | CancerGPT               | 0.091           | 0.101        | 0.112        | 0.09         | 0.095        | 0.101        | 0.076        | 0.12         |
|               | GPT-2                   | 0.065           | 0.079        | 0.069        | 0.097        | 0.085        | 0.062        | 0.086        | 0.087        |
|               | SciFive                 | <b>0.103</b>    | 0.067        | 0.116        | 0.087        | 0.09         | 0.081        | 0.088        | 0.097        |
|               | GPT-3                   | 0.064           | 0.051        | 0.045        | 0.058        | 0.068        | 0.087        | 0.101        | <b>0.181</b> |

Supplementary Table 3: AUPRC Full Tuning

|               | Methods        | Number of Shots |              |              |              |              |              |              |
|---------------|----------------|-----------------|--------------|--------------|--------------|--------------|--------------|--------------|
|               |                | 2               | 4            | 8            | 16           | 32           | 64           | 128          |
| Liver         | TabTransformer | <b>0.686</b>    | <b>0.801</b> | <b>0.788</b> | 0.827        | <b>0.859</b> | <b>0.788</b> | 0.84         |
|               | CancerGPT      | 0.474           | 0.603        | 0.66         | <b>0.853</b> | 0.814        | 0.737        | <b>0.904</b> |
|               | GPT-2          | 0.365           | 0.686        | 0.66         | 0.801        | 0.801        | 0.75         | 0.891        |
|               | SciFive        | 0.609           | 0.692        | 0.686        | 0.731        | 0.699        | 0.66         | 0.724        |
|               | GPT-3          | 0.417           | 0.506        | 0.442        | 0.878        | 0.795        | 0.731        | 0.776        |
| Soft Tissue   | TabTransformer | 0.138           | 0.242        | 0.463        | 0.598        | 0.668        | 0.818        | 0.82         |
|               | CancerGPT      | <b>0.618</b>    | 0.632        | 0.684        | 0.703        | 0.751        | 0.777        | 0.867        |
|               | GPT-2          | 0.467           | <b>0.671</b> | 0.619        | 0.604        | <b>0.901</b> | <b>0.938</b> | 0.862        |
|               | SciFive        | 0.594           | 0.604        | <b>0.699</b> | <b>0.758</b> | 0.788        | 0.847        | 0.821        |
|               | GPT-3          | 0.492           | 0.667        | 0.624        | 0.734        | 0.888        | 0.869        | <b>0.878</b> |
| Urinary Tract | TabTransformer | 0.501           | 0.491        | 0.523        | 0.456        | 0.512        | 0.566        | 0.585        |
|               | CancerGPT      | 0.563           | 0.458        | 0.425        | 0.608        | 0.546        | 0.625        | 0.645        |
|               | GPT-2          | 0.552           | 0.499        | 0.515        | 0.518        | 0.553        | 0.571        | 0.648        |
|               | SciFive        | <b>0.629</b>    | <b>0.659</b> | <b>0.661</b> | <b>0.655</b> | <b>0.651</b> | <b>0.654</b> | <b>0.668</b> |
|               | GPT-3          | 0.62            | 0.6          | 0.604        | 0.575        | 0.539        | 0.609        | 0.634        |
| Endometrium   | TabTransformer | <b>0.918</b>    | <b>0.959</b> | 0.918        | 0.959        | 0.878        | -            | -            |
|               | CancerGPT      | 0.265           | 0.265        | 0.531        | 0.551        | 0.816        | -            | -            |
|               | GPT-2          | 0.469           | 0.714        | <b>1</b>     | <b>1</b>     | <b>1</b>     | -            | -            |
|               | SciFive        | 0.673           | 0.633        | 0.857        | 0.878        | 0.857        | -            | -            |
|               | GPT-3          | 0.347           | 0.592        | 0.694        | 0.673        | 0.857        | -            | -            |
| Stomach       | TabTransformer | 0.585           | 0.529        | 0.639        | 0.626        | 0.581        | 0.659        | <b>0.813</b> |
|               | CancerGPT      | 0.767           | <b>0.785</b> | <b>0.777</b> | 0.714        | 0.734        | 0.751        | 0.691        |
|               | GPT-2          | 0.743           | 0.617        | 0.724        | <b>0.73</b>  | <b>0.757</b> | 0.721        | 0.7          |
|               | SciFive        | 0.48            | 0.452        | 0.515        | 0.545        | 0.517        | 0.593        | 0.6          |
|               | GPT-3          | <b>0.774</b>    | 0.756        | 0.714        | 0.698        | 0.732        | <b>0.782</b> | 0.731        |
| Bone          | TabTransformer | <b>0.717</b>    | <b>0.786</b> | <b>0.776</b> | <b>0.757</b> | <b>0.71</b>  | 0.677        | 0.732        |
|               | CancerGPT      | 0.651           | 0.623        | 0.612        | 0.601        | 0.609        | 0.613        | 0.68         |
|               | GPT-2          | 0.373           | 0.434        | 0.522        | 0.607        | 0.67         | 0.627        | <b>0.734</b> |
|               | SciFive        | 0.396           | 0.596        | 0.622        | 0.584        | 0.496        | 0.493        | 0.565        |
|               | GPT-3          | 0.657           | 0.678        | 0.688        | 0.69         | 0.697        | <b>0.688</b> | 0.721        |

Supplementary Table 4: AUROC Last Layer Tuning

|               | Methods        | Number of Shots |              |              |              |              |              |              |
|---------------|----------------|-----------------|--------------|--------------|--------------|--------------|--------------|--------------|
|               |                | 2               | 4            | 8            | 16           | 32           | 64           | 128          |
| Liver         | TabTransformer | <b>0.243</b>    | <b>0.516</b> | <b>0.48</b>  | <b>0.55</b>  | 0.3          | 0.233        | 0.352        |
|               | CancerGPT      | 0.12            | 0.132        | 0.238        | 0.343        | <b>0.599</b> | <b>0.392</b> | <b>0.674</b> |
|               | GPT-2          | 0.091           | 0.371        | 0.377        | 0.523        | 0.44         | 0.257        | 0.421        |
|               | SciFive        | 0.186           | 0.313        | 0.296        | 0.346        | 0.448        | 0.377        | 0.449        |
|               | GPT-3          | 0.126           | 0.137        | 0.123        | 0.405        | 0.469        | 0.38         | 0.401        |
| Soft Tissue   | TabTransformer | 0.151           | 0.171        | 0.249        | 0.315        | 0.354        | 0.646        | 0.61         |
|               | CancerGPT      | 0.298           | 0.304        | 0.349        | 0.364        | 0.41         | 0.431        | 0.575        |
|               | GPT-2          | 0.276           | 0.404        | 0.337        | 0.355        | <b>0.708</b> | <b>0.833</b> | <b>0.73</b>  |
|               | SciFive        | <b>0.543</b>    | <b>0.469</b> | <b>0.519</b> | <b>0.53</b>  | 0.462        | 0.531        | 0.504        |
|               | GPT-3          | 0.263           | 0.379        | 0.337        | 0.468        | 0.662        | 0.609        | 0.662        |
| Urinary Tract | TabTransformer | 0.253           | 0.219        | 0.237        | 0.188        | 0.21         | 0.228        | 0.248        |
|               | CancerGPT      | 0.232           | 0.187        | 0.162        | 0.266        | 0.218        | 0.282        | 0.287        |
|               | GPT-2          | 0.217           | 0.188        | 0.213        | 0.229        | 0.231        | 0.267        | 0.315        |
|               | SciFive        | <b>0.279</b>    | <b>0.305</b> | <b>0.333</b> | <b>0.324</b> | <b>0.31</b>  | <b>0.332</b> | <b>0.35</b>  |
|               | GPT-3          | 0.3             | 0.279        | 0.268        | 0.25         | 0.232        | 0.319        | 0.284        |
| Endometrium   | TabTransformer | <b>0.933</b>    | <b>0.962</b> | 0.909        | 0.962        | 0.826        | -            | -            |
|               | CancerGPT      | 0.427           | 0.42         | 0.613        | 0.562        | 0.833        | -            | -            |
|               | GPT-2          | 0.537           | 0.633        | <b>1</b>     | <b>1</b>     | <b>1</b>     | -            | -            |
|               | SciFive        | 0.687           | 0.659        | 0.886        | 0.91         | 0.881        | -            | -            |
|               | GPT-3          | 0.433           | 0.569        | 0.662        | 0.653        | 0.844        | -            | -            |
| Stomach       | TabTransformer | 0.159           | 0.134        | 0.185        | 0.181        | 0.204        | 0.233        | 0.373        |
|               | CancerGPT      | 0.239           | 0.31         | <b>0.301</b> | 0.285        | <b>0.309</b> | <b>0.401</b> | <b>0.418</b> |
|               | GPT-2          | 0.281           | 0.164        | 0.295        | <b>0.287</b> | 0.256        | 0.316        | 0.197        |
|               | SciFive        | 0.129           | 0.102        | 0.097        | 0.104        | 0.099        | 0.117        | 0.142        |
|               | GPT-3          | <b>0.318</b>    | <b>0.314</b> | 0.255        | 0.227        | 0.253        | 0.272        | 0.201        |
| Bone          | TabTransformer | <b>0.142</b>    | <b>0.154</b> | <b>0.182</b> | <b>0.168</b> | <b>0.18</b>  | <b>0.164</b> | <b>0.197</b> |
|               | CancerGPT      | 0.119           | 0.111        | 0.107        | 0.1          | 0.119        | 0.097        | 0.136        |
|               | GPT-2          | 0.05            | 0.07         | 0.079        | 0.094        | 0.12         | 0.127        | 0.168        |
|               | SciFive        | 0.059           | 0.089        | 0.1          | 0.089        | 0.073        | 0.076        | 0.086        |
|               | GPT-3          | 0.102           | 0.105        | 0.107        | 0.108        | 0.107        | 0.11         | 0.153        |

Supplementary Table 5: AUPRC Last Layer Tuning

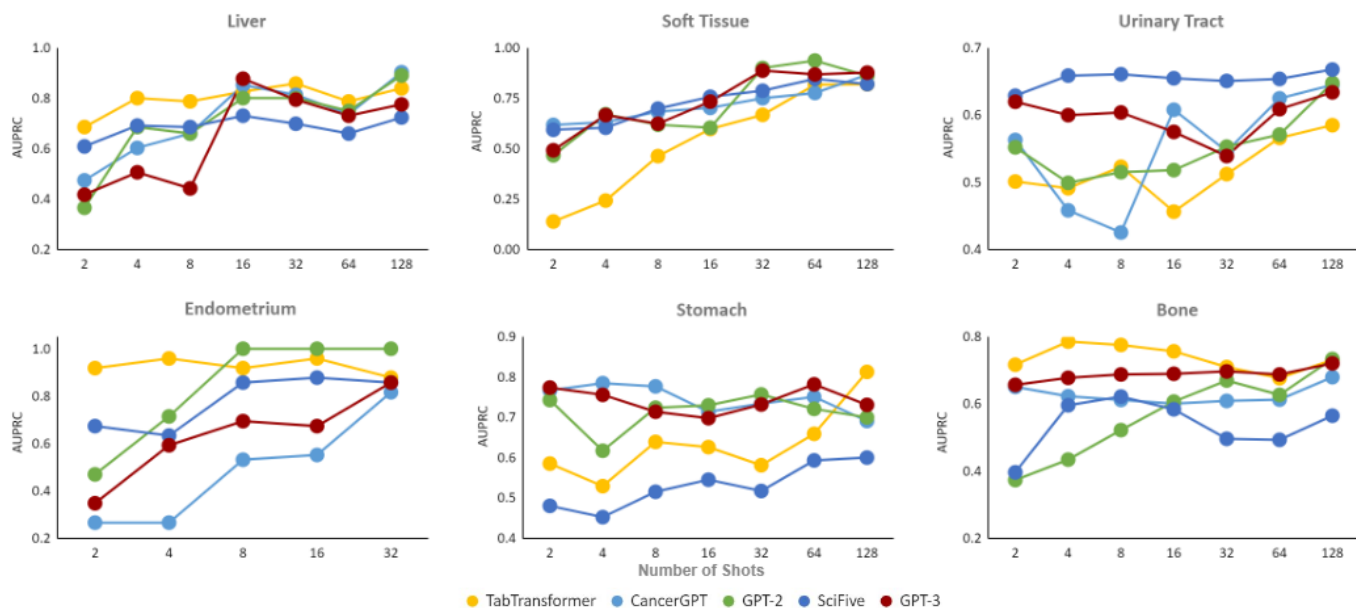

Yellow: TabTransformer, Light Blue: CancerGPT, Green: GPT-2, Dark Blue: SciFive, Red: GPT-3  
 Supplementary Figure 1: AUROC of k-shot learning on seven tissue sets with finetuning only the last layer

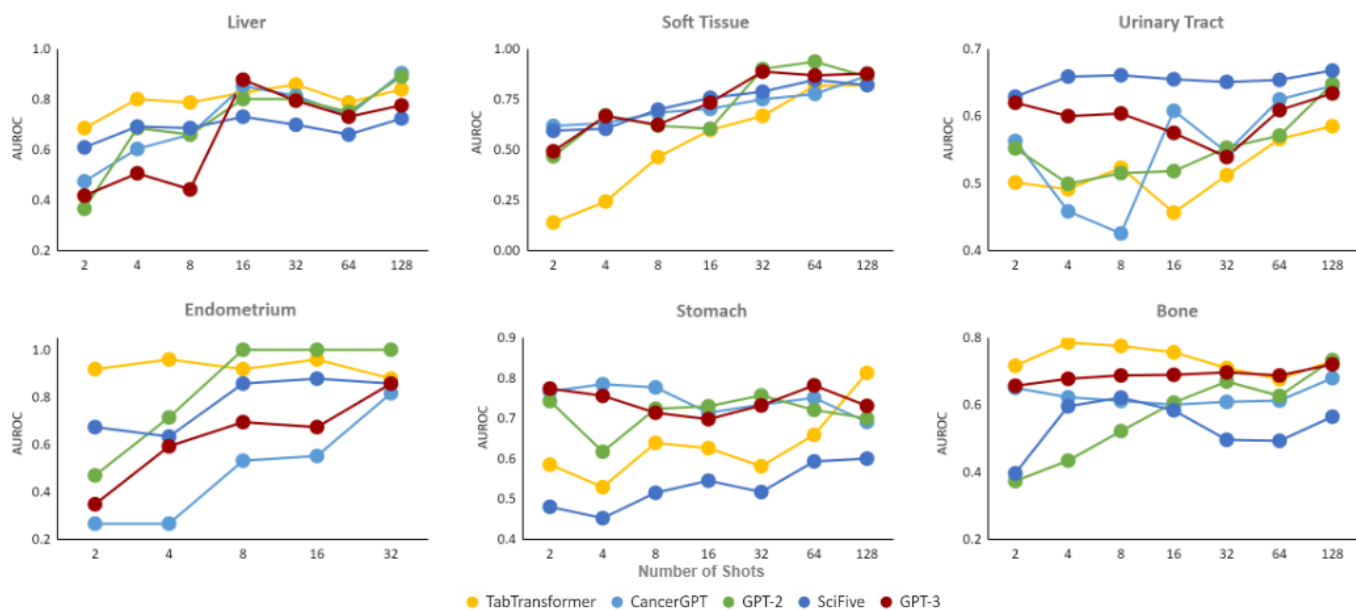

Yellow: TabTransformer, Light Blue: CancerGPT, Green: GPT-2, Dark Blue: SciFive, Red: GPT-3  
 Supplementary Figure 2: AUPRC of k-shot learning on seven tissue sets with finetuning only the last layer

#### Supplementary Note 4: Prediction Examples

|              | Predicted  |                                                                      |                                                                      |
|--------------|------------|----------------------------------------------------------------------|----------------------------------------------------------------------|
| Ground truth |            | Synergy                                                              | No Synergy                                                           |
|              | Synergy    | (Akt inhibitor VIII, Doramapimod, AGS)<br>(Doramapimod, SF1670, AGS) | (5Z-7-Oxozeaenol, 10058-F4, AGS)<br>(5Z-7-Oxozeaenol, BI605906, AGS) |
|              | No Synergy | (Akt inhibitor VIII, SF1670, AGS)<br>(PI-103, SF1670, AGS)           | (CHIR-99021, GSK429286A, AGS)<br>(BI605906, 10058-F4, AGS)           |

Supplementary Table 6: Example of prediction in stomach tissue (Drug A, Drug B, Cell line)

|              | Predicted  |                                                                    |                                                                         |
|--------------|------------|--------------------------------------------------------------------|-------------------------------------------------------------------------|
| Ground truth |            | Synergy                                                            | No Synergy                                                              |
|              | Synergy    | (915019-65-7, Trametinib, SMS-CTR)<br>(Omipalisib, Trametinib, RD) | (Omipalisib, ceritinib, RD)<br>(SCHEMBL82368, Niraparib, Rh36)          |
|              | No Synergy | (BMS-754807, MK-2206, SMS-CTR)<br>(MK-1775, 955-24-8, Rh36)        | (Stattic, SU11274, DDLS8817)<br>(Akt inhibitor VIII, Stattic, DDLS8817) |

Supplementary Table 7: Example of prediction in soft tissue (Drug A, Drug B, Cell line)

|              | Predicted  |                                                                          |                                                                                           |
|--------------|------------|--------------------------------------------------------------------------|-------------------------------------------------------------------------------------------|
| Ground truth |            | Synergy                                                                  | No Synergy                                                                                |
|              | Synergy    | (Romidepsin, Thapsigargin, EW-8)<br>(Daporinad, Panobinostat, TC-32)     | (Carfilzomib, Entinostat, TC-32)<br>(Mocetinostat, Carfilzomib, TC-71)                    |
|              | No Synergy | (Thapsigargin, Beta-Narcotine, TC-32)<br>(SCHEMBL82368, Olaparib, TC-71) | (Ethyl bromopyruvate, 717906-29-1, A-673)<br>(Doxorubicin Hydrochloride, Olaparib, TC-71) |

Supplementary Table 8: Example of prediction in bone tissue (Drug A, Drug B, Cell line)



|              |            | Predicted                                                                                |                                                                                          |
|--------------|------------|------------------------------------------------------------------------------------------|------------------------------------------------------------------------------------------|
|              |            | Synergy                                                                                  | No Synergy                                                                               |
| Ground truth | Synergy    | (Piperacetazine, Aripiprazole, Huh-7)<br>(Idrocilamide, Sertraline hydrochloride, Huh-7) | (3-Deazaneplanocin, Piperacetazine, Huh-7)<br>(Bepidil, Sertraline hydrochloride, Huh-7) |
|              | No Synergy | (Toremifene Citrate, Aripiprazole, Huh-7)<br>(Idrocilamide, Clomifene citrate, Huh-7)    | (Clomiphene, Mycophenolate Mofetil, Huh-7)<br>(3-Deazaneplanocin, Colchicine, Huh-7)     |

Supplementary Table 9: Example of prediction in liver tissue (Drug A, Drug B, Cell line)

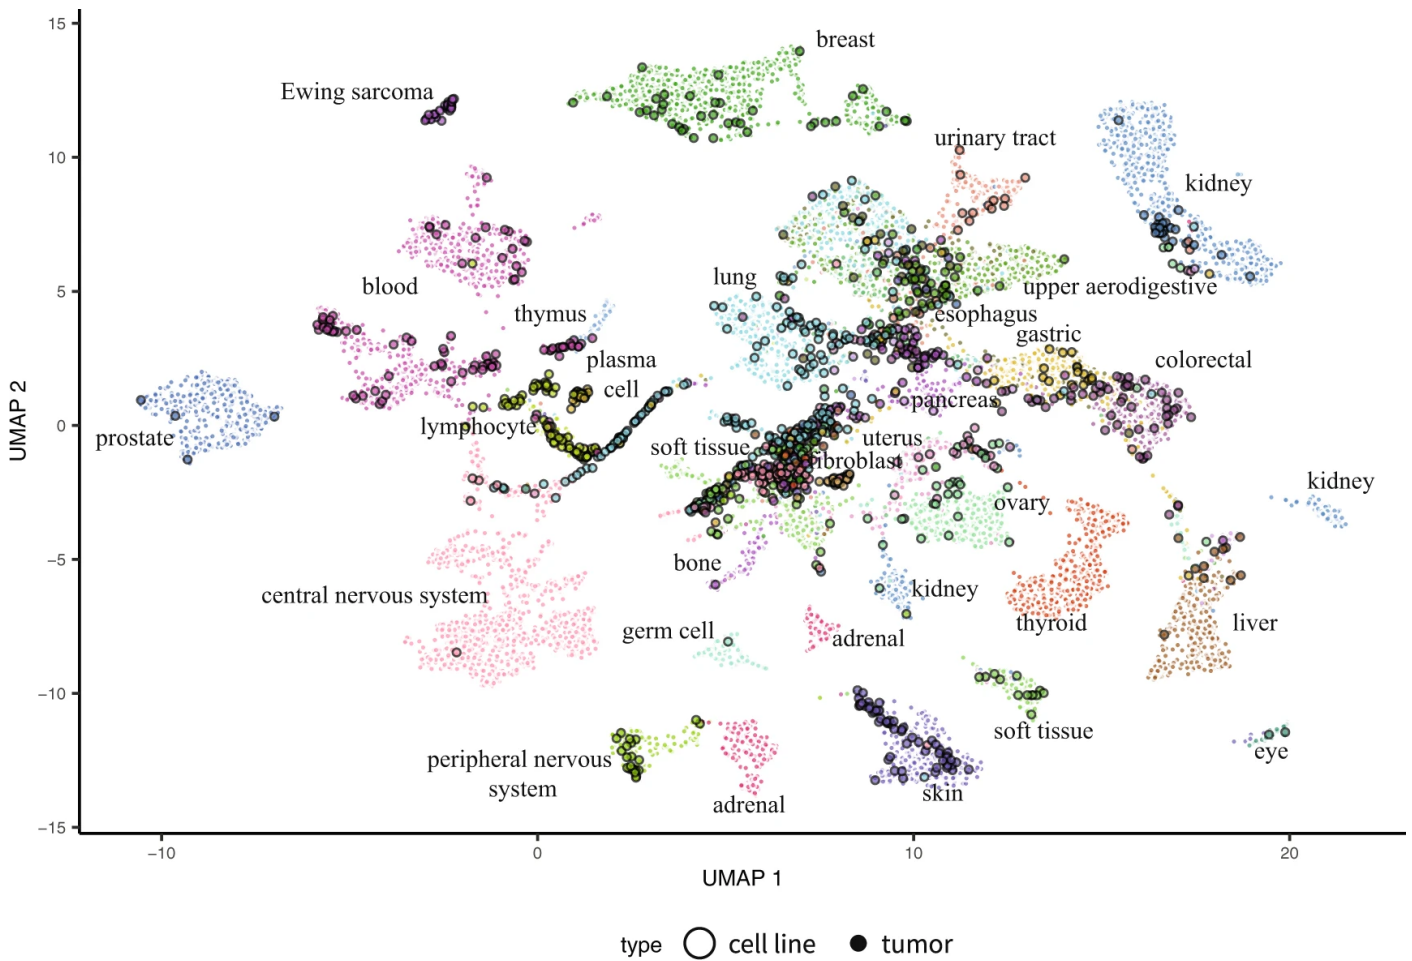

Supplementary Figure 3: UMAP 2D projection of Celligner- aligned tumor and cell line expression data colored by annotated cancer lineage. The alignment includes 12,236 tumor samples and 1,249 cell lines, across 37 cancer types. This figure is adapted from <sup>3</sup>

## Supplementary References

1. Yadav, A. K., Kumar, V., Bailey, D. B. & Jang, B.-C. AZD1208, a Pan-Pim Kinase Inhibitor, Has Anti-Growth Effect on 93T449 Human Liposarcoma Cells via Control of the Expression and Phosphorylation of Pim-3, mTOR, 4EBP-1, S6, STAT-3 and AMPK. *Int. J. Mol. Sci.* **20**, (2019).
2. Guo, S. *et al.* Overexpression of Pim-1 in bladder cancer. *J. Exp. Clin. Cancer Res.* **29**, 161 (2010).
3. Warren, A. *et al.* Global computational alignment of tumor and cell line transcriptional profiles. *Nat. Commun.* **12**, 22 (2021).
